# Supplementary material for: Introducing a curricular program culminating in a certificate for training peer tutors in medical education
Source: PubMed Central journal article supplement — GMS Z Med Ausbild. 2014 May 15;31(2):Doc19. doi: 10.3205/zma000911 (PMC4027804; doi:10.3205/zma000911), 2014-05-15
Supplement: ZMA-31-19-s-001.pdf [file ZMA-31-19-s-001.pdf]

|     |                                                                                                                                                                                                   |
|-----|---------------------------------------------------------------------------------------------------------------------------------------------------------------------------------------------------|
| (1) | Motivation and reasons for completing the training program                                                                                                                                        |
| (2) | Benefit in comparison with other medical students who did not participate in the training program                                                                                                 |
| (3) | Concrete advantages for the student's own medical studies                                                                                                                                         |
| (4) | Long-term gain on personal and professional levels                                                                                                                                                |
| (5) | Students' perception of program expectations for the individual requirements: tutor training sessions, conducting tutorials, observing peers & feedback, written reflections and final reflection |
| (6) | Value of the certificate at the end of the training program                                                                                                                                       |
